# Supplementary material for: Exacerbated Airway Toxicity of Environmental Oxidant Ozone in Mice Deficient inNrf2
Source: Hindawi journal article supplement (doi:10.1155/2013/254069), 2013-01-01
Supplement: f1 [file 254069.f1.pdf]

## Supplementary Material

Supplementary Figure 1 demonstrates airway responses to acetylcholine in *Nrf2*<sup>+/+</sup> and *Nrf2*<sup>-/-</sup> mice exposed to acute O<sub>3</sub> at 24 hr PE. Total airway resistance (R, cmH<sub>2</sub>O·s/mL) was measured in tracheotomized mice in response to increasing aerosolized acetylcholine concentrations (6.25-25 mg/mL) using the FlexiVent system. Airway reactivity was expressed as area under the curve (AUC, cmH<sub>2</sub>O·s/mL x mg/mL) for R.

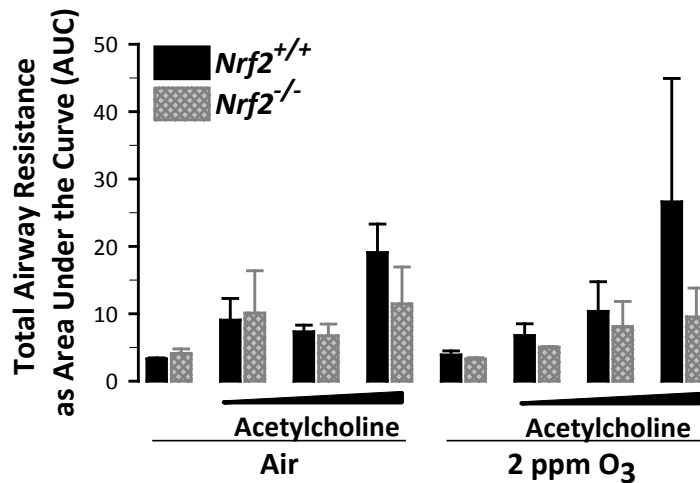

**Supplementary Figure 1.** Airway responses to acetylcholine. Response to acetylcholine (6.25-25 mg/mL) was determined using the FlexiVent system in tracheotomized mice exposed to air or 2-ppm O<sub>3</sub> (24 hr post-exposure). Total airway resistance (R, cmH<sub>2</sub>O·s/mL) measured by the FlexiVent was expressed as area under the curve (AUC, cmH<sub>2</sub>O·s/mL x mg/mL) for resistance (R) after increasing acetylcholine concentrations.
